# Supplementary material for: The parasitic worm product ES-62 normalises the gut microbiota bone marrow axis in inflammatory arthritis
Source: PubMed Central journal article supplement (PMC6451002; doi:10.1038/s41467-019-09361-0), 2019-04-05
Supplement: 41467_2019_9361_MOESM1_ESM.pdf [file 41467_2019_9361_MOESM1_ESM.pdf]

**The parasitic worm product ES-62 normalises the gut microbiota bone marrow axis in inflammatory arthritis**

**Doonan et al.**

## Supplementary Figures

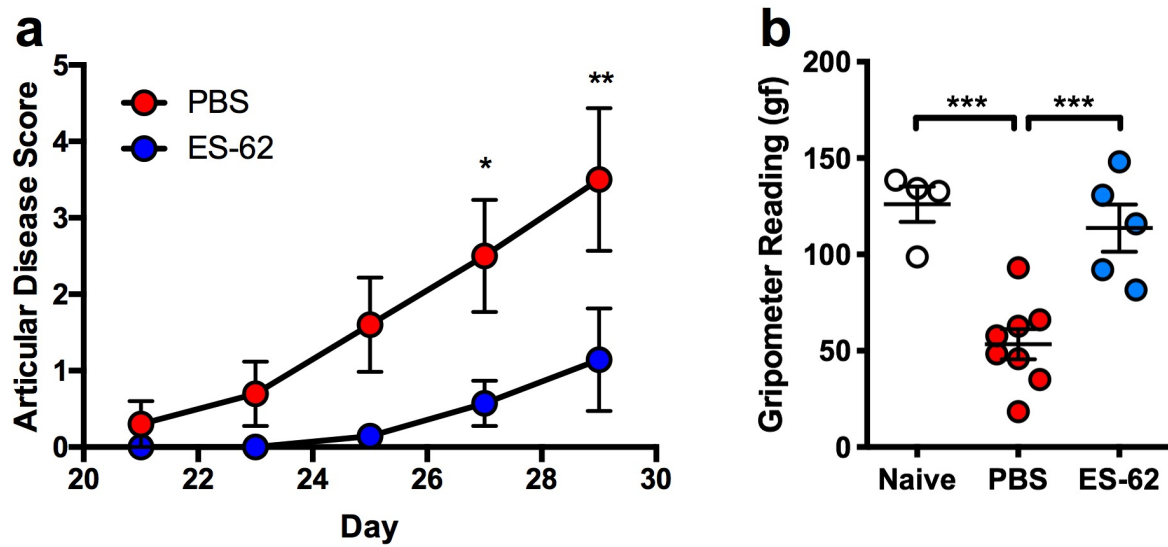

**Supplementary Fig. 1. ES-62 protects against CIA** (a) Articular scores expressed as means  $\pm$  SEM of PBS- (n = 10) or ES-62- (n = 7) treated CIA animals, with data from a single experiment. (b) Grip strength (gf) expressed as an average of three measurements per mouse determined prior to cull as an indicator of forelimb strength and joint morbidity (Naive, n = 4; PBS, n = 8 and ES-62, n = 6). Statistical significance was determined using two-way (a) and one-way ANOVA (b) with LSD Fishers multiple comparisons and for levels of significance where indicated by asterisks, \* =  $p < 0.05$ , \*\* =  $p < 0.01$  and \*\*\* =  $p < 0.001$ .

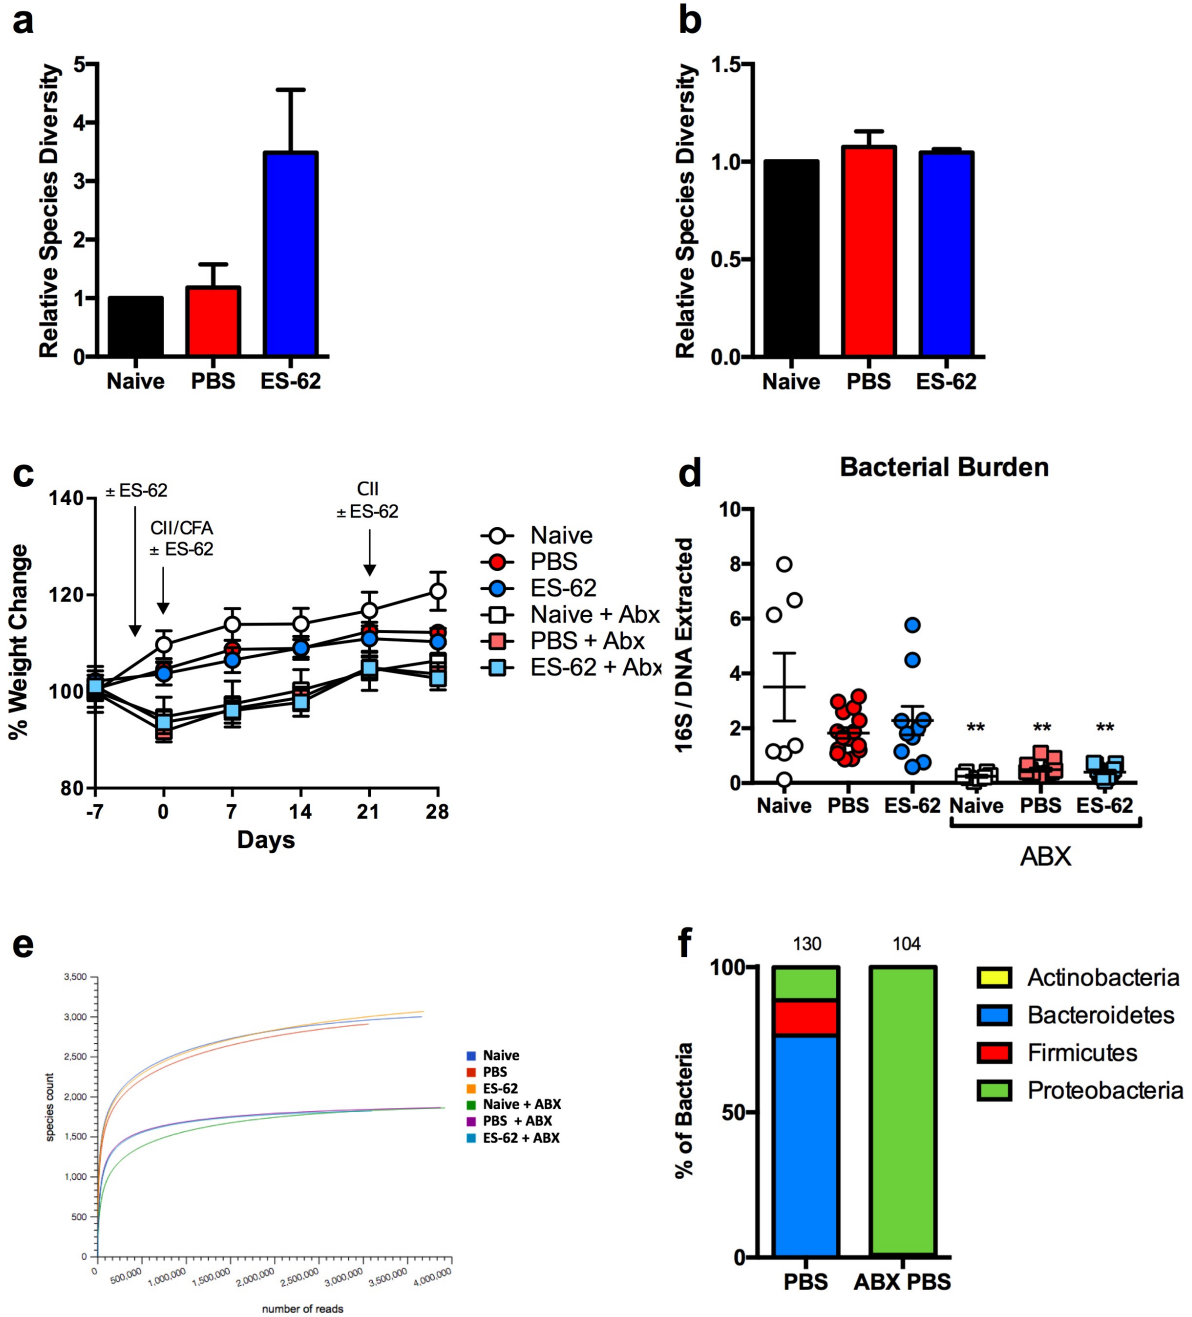

**Supplementary Fig. 2. Species diversity in CIA and depletion by antibiotics (ABX).**

The number of species detected during metagenomic analysis of the ileum (a) and colon (b) of Naive, PBS-CIA and ES-62-CIA mice. Data are presented as mean  $\pm$  SEM where for metagenomic analysis, three mice per group were pooled from three independent experiments and normalised to Naive controls. (c) Body weights of individual animals over the time course of CIA were measured from day -7 (prior to ABX administration)

and presented as mean % weight  $\pm$  SEM (Naïve; n = 8, PBS; n = 16, ES-62; n = 13, Naïve+ABX; n = 8, PBS+ABX; n = 16, ES-62+ABX; n = 15). **(d)** DNA was isolated from the colon contents of individual animals and the levels of 16S bacterial DNA detected by qPCR was measured and normalised to the levels of total DNA extracted. Symbols represent values from individual mice from a single experiment. **(e)** Representative rarefaction plots from the MG-RAST metagenomic analysis showing the levels of bacterial diversity of colon faecal matter in each treatment group from one of three experiments. **(f)** Composition of bacterial phyla present in PBS or PBS-ABX animals (metagenomic data obtained by pooling samples from 3 mice/group from a single experiment) represented as a % of all bacteria detected. Statistics: data are presented as mean  $\pm$  SEM (**c** and **d**). Statistical significance was determined using one-way ANOVA with Dunn's multiple comparisons comparing Naïve, PBS or ES-62-treated groups to their respective ABX-treated control and indicated by asterisks \*\* =  $p < 0.01$ .

**a**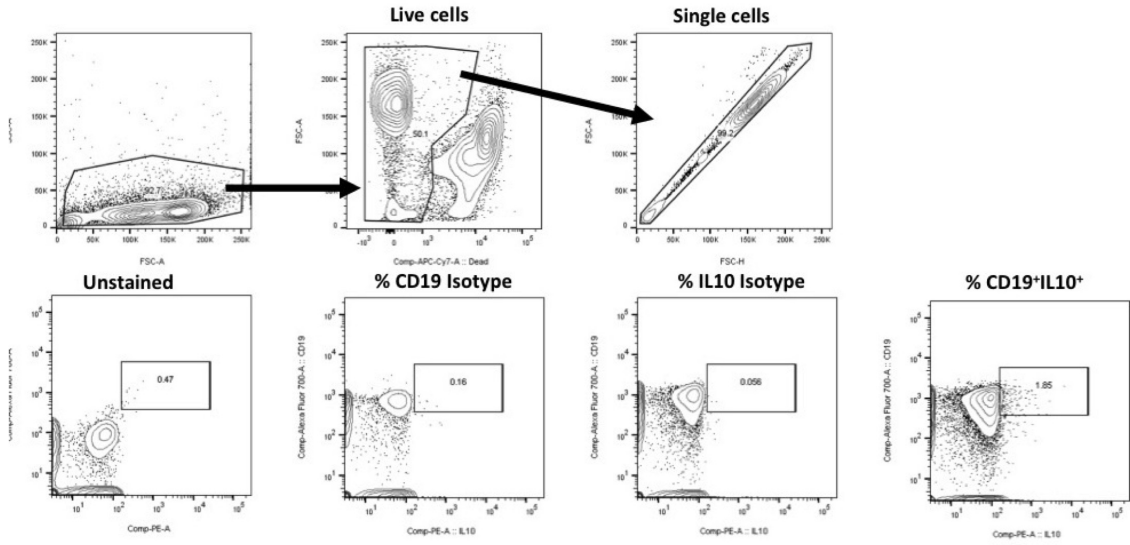**b**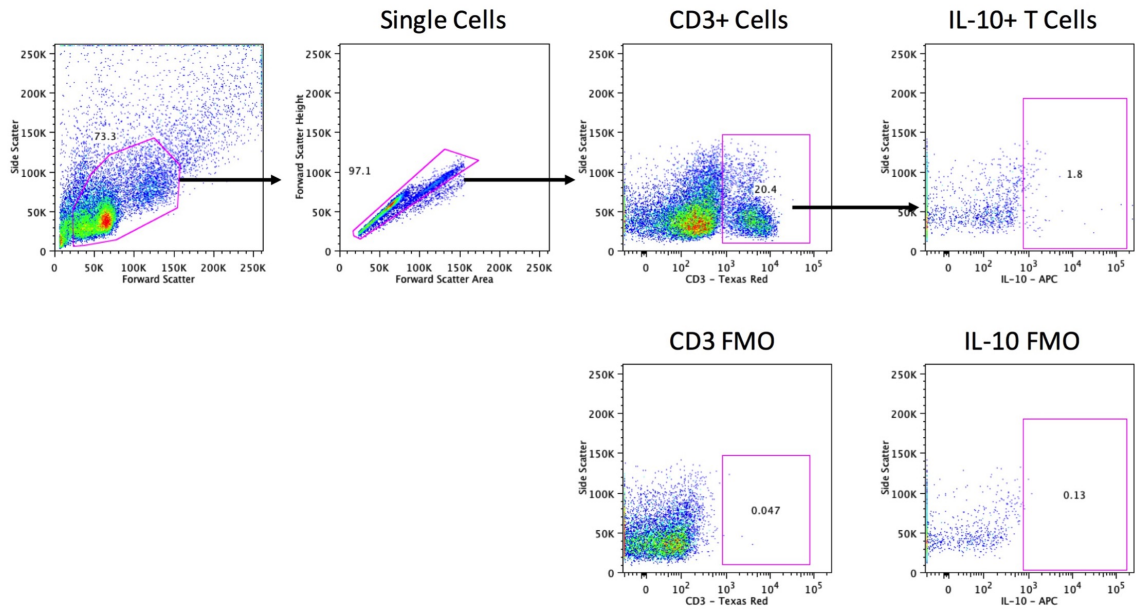**c**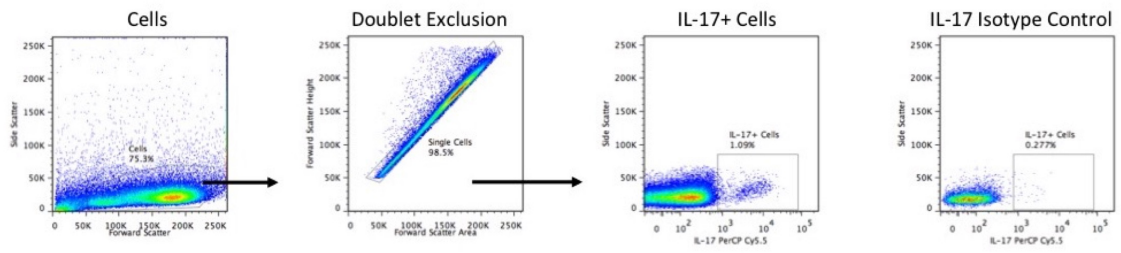**d**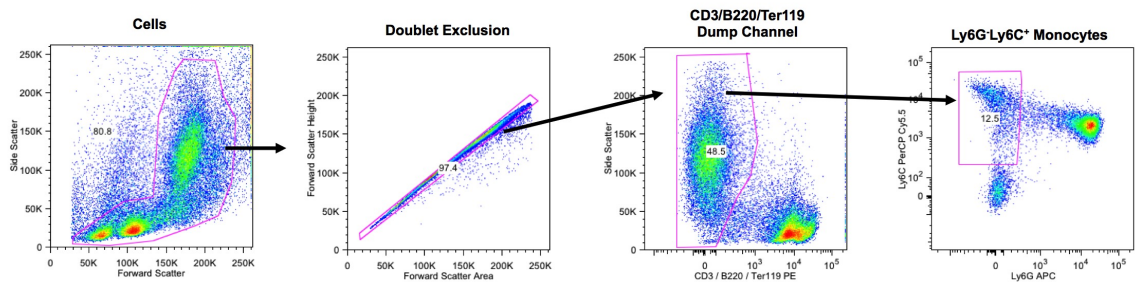

**Supplementary Fig. 3. Gating strategies** (a) Splenocytes were gated (FSC-A vs. SSC-A) and then live cells determined by their uptake of the fixable live/dead cell stain before gating for singlets (FSC-H vs. FSC-A) prior to assessing expression of CD19<sup>+</sup> IL-10<sup>+</sup> B cells (Fig. 2f), with reference to relevant isotype controls. (b) Following exclusion of dead cells/cell debris and gating of lymphocytes (by forward scatter versus side scatter), cell doublets were excluded prior to subsequent gating of CD3<sup>+</sup> and CD3<sup>+</sup>IL-10<sup>+</sup> populations relative to relevant FMO controls (Fig. 5g). (c) Following exclusion of MLN dead cells/cell debris and gating of lymphocytes (by forward scatter versus side scatter), cell doublets were excluded prior to subsequent gating of IL-17<sup>+</sup> populations relative to the relevant isotype control (Fig. 6c). (d) Gating strategy for identifying bone marrow (BM) Ly6G<sup>-</sup>Ly6C<sup>+</sup> monocytes (Fig. 6e) following exclusion of dead cells/cell debris by forward scatter versus side scatter and exclusion of cells doublets. Labelling of BM cells with a cocktail of PE-labelled antibodies specific for CD3, B220 and Ter119 allowed exclusion of lymphocytes and erythroid cell populations using a dump channel, and monocytes were identified by labelling with antibodies against Ly6C (PerCP Cy5.5) and Ly6G (APC) as shown.

**Supplementary Table 1. Bacterial abundance of the Colon samples (from Fig. 1b).**

| <b>Bacteria</b>                             | <b>Naïve</b> | <b>PBS</b> | <b>ES-62</b> |
|---------------------------------------------|--------------|------------|--------------|
| Firmicutes                                  | 63.367       | 28.901     | 50.344       |
| Clostridia                                  | 57.453       | 25.434     | 44.993       |
| Clostridiales                               | 57.380       | 25.393     | 44.873       |
| Bacteroidetes                               | 34.556       | 64.198     | 48.062       |
| Bacteroidia                                 | 34.207       | 64.081     | 47.770       |
| Bacteroidaceae                              | 24.700       | 60.203     | 38.278       |
| Clostridiaceae                              | 21.931       | 9.504      | 17.326       |
| Clostridium                                 | 21.903       | 9.492      | 17.300       |
| Lachnospiraceae                             | 15.064       | 7.304      | 12.544       |
| Ruminococcaceae                             | 11.578       | 4.675      | 8.504        |
| Alistipes putredinis                        | 7.350        | 2.054      | 6.872        |
| Rikenellaceae                               | 7.350        | 2.054      | 6.872        |
| Ruminococcus                                | 6.670        | 2.374      | 4.265        |
| Roseburia                                   | 5.970        | 3.266      | 6.149        |
| Eubacteriaceae                              | 5.483        | 2.475      | 4.078        |
| Eubacterium                                 | 5.059        | 2.369      | 3.840        |
| Clostridium methylpentosum                  | 3.896        | 1.803      | 2.967        |
| Marvinbryantia formatexigens                | 3.495        | 1.719      | 2.558        |
| unclassified (derived from Lachnospiraceae) | 3.495        | 1.719      | 2.558        |
| Erysipelotrichi                             | 3.196        | 1.500      | 2.175        |
| unclassified (derived from Clostridiales)   | 3.120        | 1.346      | 2.280        |
| Roseburia inulinivorans                     | 3.103        | 1.459      | 3.105        |
| Roseburia intestinalis                      | 2.867        | 1.806      | 3.044        |
| Clostridium nexile                          | 2.773        | 1.054      | 2.175        |
| Bacteroides fragilis                        | 2.765        | 2.147      | 3.137        |
| Clostridium scindens                        | 2.650        | 1.215      | 2.386        |
| Bacilli                                     | 2.538        | 1.900      | 3.058        |
| Clostridium hathewayi                       | 2.429        | 1.042      | 1.894        |
| Eubacterium rectale                         | 2.299        | 0.997      | 1.258        |
| Lactobacillales                             | 2.260        | 1.770      | 2.869        |
| Blautia                                     | 2.048        | 0.864      | 1.420        |
| Bacteroides uniformis                       | 1.991        | 4.644      | 5.045        |
| Butyrivibrio                                | 1.937        | 0.805      | 1.255        |
| Coproccoccus                                | 1.859        | 0.740      | 1.194        |
| Bacteroides vulgatus                        | 1.819        | 21.460     | 4.413        |
| Clostridium bolteae                         | 1.798        | 0.678      | 1.116        |
| Faecalibacterium                            | 1.761        | 0.946      | 1.998        |
| Faecalibacterium prausnitzii                | 1.761        | 0.946      | 1.998        |

|                                                 |       |       |       |
|-------------------------------------------------|-------|-------|-------|
| Holdemania                                      | 1.706 | 0.751 | 1.269 |
| Holdemania filiformis                           | 1.706 | 0.751 | 1.269 |
| Bacteroides ovatus                              | 1.684 | 1.279 | 2.243 |
| Bacteroides sp. D20                             | 1.610 | 3.341 | 3.557 |
| Lactobacillaceae                                | 1.570 | 1.213 | 1.796 |
| Bacteroides capillosus                          | 1.524 | 0.584 | 1.200 |
| Clostridium sp. M62/1                           | 1.472 | 0.536 | 1.225 |
| unclassified (derived from Erysipelotrichaceae) | 1.348 | 0.691 | 0.806 |
| Proteobacteria                                  | 1.338 | 6.530 | 0.952 |
| Clostridium difficile                           | 1.308 | 0.556 | 0.929 |
| Porphyromonadaceae                              | 1.291 | 1.238 | 1.553 |
| Butyrivibrio crossotus                          | 1.280 | 0.404 | 0.737 |
| Dorea                                           | 1.246 | 0.544 | 0.875 |
| Ruminococcaceae bacterium D16                   | 1.199 | 0.466 | 0.804 |
| unclassified (derived from Ruminococcaceae)     | 1.199 | 0.466 | 0.804 |
| Bacteroides sp. 1_1_6                           | 1.193 | 1.194 | 1.493 |
| Bacteroides sp. 2_2_4                           | 1.182 | 1.377 | 1.404 |
| Blautia hydrogenotrophica                       | 1.174 | 0.506 | 0.633 |
| Bacteroides xylanisolvens                       | 1.123 | 0.891 | 1.523 |
| Parabacteroides                                 | 1.116 | 1.035 | 1.198 |
| Coprococcus comes                               | 1.115 | 0.434 | 0.801 |
| Clostridium saccharolyticum                     | 1.089 | 0.489 | 0.856 |
| unclassified (derived from Clostridiales)       | 1.066 | 0.479 | 0.851 |
| Clostridiales bacterium 1_7_47FAA               | 1.058 | 0.471 | 0.836 |
| Anaerotruncus                                   | 1.048 | 0.544 | 0.827 |
| Anaerotruncus colihominis                       | 1.048 | 0.544 | 0.827 |
| Bacteroides sp. 4_3_47FAA                       | 0.964 | 9.752 | 2.270 |
| Eubacterium eligens                             | 0.874 | 0.400 | 0.737 |
| Blautia hansenii                                | 0.874 | 0.358 | 0.787 |
| Clostridium phytofermentans                     | 0.862 | 0.436 | 0.799 |
| Erysipelotrichaceae bacterium 5_2_54FAA         | 0.860 | 0.359 | 0.430 |
| Prevotellaceae                                  | 0.853 | 0.584 | 1.064 |
| Bacteroides sp. D2                              | 0.807 | 0.650 | 1.030 |
| Eubacterium ventriosum                          | 0.777 | 0.451 | 0.809 |
| Dorea formicigenerans                           | 0.762 | 0.310 | 0.462 |
| Coprococcus eutactus                            | 0.744 | 0.306 | 0.392 |
| Bacteroides caccae                              | 0.723 | 0.632 | 1.059 |
| Clostridium leptum                              | 0.716 | 0.238 | 0.489 |
| Bacteroides dorei                               | 0.707 | 4.120 | 1.363 |
| Bacteroides finegoldii                          | 0.696 | 0.622 | 0.948 |
| Clostridium proteoclasticum                     | 0.657 | 0.400 | 0.518 |
| Bacteroides intestinalis                        | 0.647 | 0.799 | 0.759 |



|                                      |       |       |       |
|--------------------------------------|-------|-------|-------|
| Bacteroides sp. D22                  | 0.604 | 0.474 | 0.799 |
| Clostridium sp. HGF2                 | 0.600 | 0.292 | 0.476 |
| Bacteroides thetaiotaomicron         | 0.563 | 0.609 | 0.762 |
| Deltaproteobacteria                  | 0.518 | 0.214 | 0.412 |
| Clostridium asparagiforme            | 0.510 | 0.380 | 0.634 |
| Clostridium hylemonae                | 0.500 | 0.207 | 0.449 |
| Dorea longicatena                    | 0.483 | 0.234 | 0.414 |
| Ethanoligenens                       | 0.481 | 0.111 | 0.352 |
| Ethanoligenens harbinense            | 0.481 | 0.111 | 0.352 |
| Desulfovibrionales                   | 0.469 | 0.190 | 0.372 |
| Desulfovibrionaceae                  | 0.462 | 0.185 | 0.369 |
| Eubacterium hallii                   | 0.449 | 0.212 | 0.325 |
| Bacteroides sp. 2_1_33B              | 0.445 | 0.433 | 0.387 |
| Gammaproteobacteria                  | 0.443 | 0.898 | 0.251 |
| Bacteroides pectinophilus            | 0.442 | 0.240 | 0.460 |
| Clostridium sp. L2-50                | 0.432 | 0.124 | 0.225 |
| Bacteroides sp. 20_3                 | 0.417 | 0.411 | 0.380 |
| Subdoligranulum                      | 0.416 | 0.226 | 0.254 |
| Subdoligranulum variabile            | 0.416 | 0.226 | 0.254 |
| Anaerofustis                         | 0.413 | 0.095 | 0.226 |
| Anaerofustis stercorihominis         | 0.413 | 0.095 | 0.226 |
| Desulfovibrio                        | 0.389 | 0.161 | 0.316 |
| Bacteroides coprocola                | 0.383 | 0.344 | 0.544 |
| Parabacteroides distasonis           | 0.381 | 0.357 | 0.268 |
| Eubacterium saburreum                | 0.367 | 0.154 | 0.409 |
| Anaerostipes                         | 0.363 | 0.116 | 0.265 |
| Anaerostipes caccae                  | 0.363 | 0.116 | 0.265 |
| Actinobacteria                       | 0.335 | 0.187 | 0.318 |
| Parabacteroides sp. D13              | 0.328 | 0.270 | 0.315 |
| Enterococcaceae                      | 0.320 | 0.342 | 0.689 |
| Clostridium sp. SS2/1                | 0.315 | 0.159 | 0.183 |
| Bacteroides sp. 9_1_42FAA            | 0.308 | 1.163 | 0.503 |
| Bacillales                           | 0.278 | 0.129 | 0.188 |
| Bacteroides sp. 3_1_23               | 0.245 | 0.154 | 0.229 |
| Parabacteroides johnsonii            | 0.230 | 0.172 | 0.299 |
| Bacteroides stercoris                | 0.216 | 0.438 | 0.351 |
| Bacteroides cellulosilyticus         | 0.207 | 0.191 | 0.298 |
| Eubacterium dolichum                 | 0.205 | 0.133 | 0.108 |
| Flavobacteria                        | 0.204 | 0.064 | 0.159 |
| Enterococcus faecalis                | 0.203 | 0.277 | 0.539 |
| Bacteroides plebeius                 | 0.199 | 0.201 | 0.260 |
| Erysipelotrichaceae bacterium 3_1_53 | 0.197 | 0.159 | 0.203 |

|                             |       |       |       |
|-----------------------------|-------|-------|-------|
| Eubacterium cellulosolvens  | 0.196 | 0.060 | 0.155 |
| Bacteroides sp. 3_1_33FAA   | 0.185 | 0.708 | 0.430 |
| Bacteroides eggerthii       | 0.184 | 0.291 | 0.294 |
| Negativicutes               | 0.181 | 0.067 | 0.118 |
| Selenomonadales             | 0.181 | 0.067 | 0.118 |
| Aerococcaceae               | 0.180 | 0.059 | 0.115 |
| Parabacteroides merdae      | 0.176 | 0.235 | 0.316 |
| Abiotrophia                 | 0.175 | 0.056 | 0.094 |
| Abiotrophia defectiva       | 0.175 | 0.056 | 0.094 |
| Flavobacteriaceae           | 0.173 | 0.053 | 0.121 |
| Betaproteobacteria          | 0.167 | 0.121 | 0.122 |
| Bacteroides sp. 2_1_16      | 0.159 | 0.280 | 0.247 |
| Streptococcaceae            | 0.154 | 0.134 | 0.220 |
| Coriobacteriales            | 0.152 | 0.115 | 0.201 |
| Enterobacteriales           | 0.151 | 0.826 | 0.130 |
| Streptococcus               | 0.151 | 0.129 | 0.210 |
| Burkholderiales             | 0.139 | 0.107 | 0.102 |
| Alphaproteobacteria         | 0.138 | 0.038 | 0.096 |
| Bacteroides sp. D1          | 0.136 | 0.138 | 0.253 |
| Clostridium cellulovorans   | 0.134 | 0.053 | 0.054 |
| Desulfovibrio sp. 3_1_syn3  | 0.128 | 0.051 | 0.095 |
| Porphyromonas               | 0.124 | 0.103 | 0.205 |
| Bacteroides sp. 2_1_7       | 0.123 | 0.121 | 0.084 |
| Desulfovibrio desulfuricans | 0.123 | 0.035 | 0.086 |
| Bacteroides sp. 1_1_14      | 0.122 | 0.085 | 0.167 |
| Bacillaceae                 | 0.122 | 0.066 | 0.066 |
| Bacteroides sp. 3_1_19      | 0.118 | 0.128 | 0.058 |
| Veillonellaceae             | 0.114 | 0.039 | 0.076 |
| Actinomycetales             | 0.099 | 0.031 | 0.052 |
| Prevotella buccalis         | 0.089 | 0.086 | 0.164 |
| Prevotella ruminicola       | 0.089 | 0.054 | 0.124 |
| Bacillus                    | 0.089 | 0.043 | 0.055 |
| Enterococcus faecium        | 0.087 | 0.058 | 0.118 |
| Porphyromonas gingivalis    | 0.087 | 0.053 | 0.077 |
| Clostridium botulinum       | 0.087 | 0.046 | 0.064 |
| Shuttleworthia              | 0.086 | 0.047 | 0.098 |
| Shuttleworthia satelles     | 0.086 | 0.047 | 0.098 |
| Prevotella oris             | 0.085 | 0.038 | 0.062 |
| Staphylococcaceae           | 0.085 | 0.024 | 0.043 |
| Staphylococcus              | 0.082 | 0.023 | 0.041 |
| Bacteroides coprophilus     | 0.081 | 0.127 | 0.081 |
| Bacteroides sp. 2_1_22      | 0.081 | 0.060 | 0.104 |

|                                           |       |       |       |
|-------------------------------------------|-------|-------|-------|
| Oribacterium                              | 0.081 | 0.058 | 0.073 |
| Bifidobacteriales                         | 0.079 | 0.038 | 0.063 |
| Peptococcaceae                            | 0.079 | 0.033 | 0.053 |
| Bifidobacterium                           | 0.078 | 0.029 | 0.035 |
| Clostridium perfringens                   | 0.078 | 0.023 | 0.041 |
| Catenibacterium                           | 0.075 | 0.033 | 0.057 |
| Catenibacterium mitsuokai                 | 0.075 | 0.033 | 0.057 |
| Lawsonia                                  | 0.073 | 0.024 | 0.053 |
| Lawsonia intracellularis                  | 0.073 | 0.024 | 0.053 |
| Epsilonproteobacteria                     | 0.071 | 5.256 | 0.069 |
| Prevotella tanneriae                      | 0.071 | 0.033 | 0.074 |
| Prevotella buccae                         | 0.070 | 0.042 | 0.065 |
| Acidaminococcaceae                        | 0.068 | 0.028 | 0.041 |
| Campylobacteriales                        | 0.066 | 5.253 | 0.066 |
| Desulfovibrio vulgaris                    | 0.066 | 0.042 | 0.049 |
| Rhizobiales                               | 0.065 | 0.009 | 0.018 |
| Thermoanaerobacteriales                   | 0.064 | 0.037 | 0.114 |
| Prevotella sp. oral taxon 472             | 0.064 | 0.020 | 0.065 |
| Desulfovibrio piger                       | 0.062 | 0.027 | 0.067 |
| Eubacterium bifforme                      | 0.062 | 0.016 | 0.036 |
| Prevotella timonensis                     | 0.058 | 0.030 | 0.068 |
| Pasteurellales                            | 0.057 | 0.015 | 0.036 |
| Oribacterium sp. oral taxon 078           | 0.056 | 0.038 | 0.039 |
| unclassified (derived from Bacteroidetes) | 0.056 | 0.015 | 0.029 |
| Eubacterium limosum                       | 0.053 | 0.038 | 0.071 |
| Bacteroides sp. 3_2_5                     | 0.050 | 0.117 | 0.143 |
| Paludibacter                              | 0.050 | 0.101 | 0.150 |
| Paludibacter propionicigenes              | 0.050 | 0.101 | 0.150 |
| Eggerthella                               | 0.048 | 0.048 | 0.084 |
| Fusobacteria                              | 0.048 | 0.027 | 0.045 |
| Collinsella                               | 0.048 | 0.020 | 0.043 |
| Prevotella disiens                        | 0.048 | 0.019 | 0.052 |
| Photorhabdus                              | 0.048 | 0.017 | 0.058 |
| Photorhabdus luminescens                  | 0.048 | 0.017 | 0.057 |
| Campylobacteraceae                        | 0.046 | 0.033 | 0.029 |
| Sphingobacteria                           | 0.045 | 0.029 | 0.066 |
| Prevotella bryantii                       | 0.045 | 0.020 | 0.041 |
| Mitsuokella                               | 0.045 | 0.009 | 0.013 |
| Prevotella melaninogenica                 | 0.044 | 0.037 | 0.080 |
| Campylobacter                             | 0.044 | 0.031 | 0.027 |
| Prevotella sp. oral taxon 299             | 0.044 | 0.014 | 0.040 |
| Clostridiales Family XI. Incertae Sedis   | 0.044 | 0.010 | 0.029 |

|                                              |       |       |       |
|----------------------------------------------|-------|-------|-------|
| Cytophagia                                   | 0.044 | 0.009 | 0.037 |
| Peptostreptococcaceae                        | 0.042 | 0.010 | 0.049 |
| Eubacterium siraeum                          | 0.041 | 0.046 | 0.057 |
| Spirochaetes                                 | 0.041 | 0.027 | 0.030 |
| Sphingobacteriaceae                          | 0.040 | 0.027 | 0.064 |
| Campylobacter jejuni                         | 0.038 | 0.021 | 0.018 |
| Prevotella bivia                             | 0.037 | 0.070 | 0.029 |
| Streptococcus pneumoniae                     | 0.037 | 0.024 | 0.028 |
| Cyanobacteria                                | 0.036 | 0.024 | 0.044 |
| Paenibacillaceae                             | 0.032 | 0.020 | 0.045 |
| Streptococcus equinus                        | 0.030 | 0.041 | 0.040 |
| Paenibacillus                                | 0.030 | 0.019 | 0.034 |
| Escherichia                                  | 0.029 | 0.692 | 0.026 |
| Prevotella copri                             | 0.029 | 0.034 | 0.053 |
| Clostridium hiranonis                        | 0.029 | 0.021 | 0.052 |
| Clostridium acetobutylicum                   | 0.028 | 0.026 | 0.011 |
| Alkaliphilus                                 | 0.028 | 0.013 | 0.026 |
| Cellulosilyticum                             | 0.028 | 0.009 | 0.076 |
| Clostridium lentocellum                      | 0.028 | 0.009 | 0.076 |
| Escherichia coli                             | 0.026 | 0.622 | 0.022 |
| Synergistetes                                | 0.026 | 0.010 | 0.018 |
| Oribacterium sinus                           | 0.025 | 0.020 | 0.034 |
| Fusobacterium                                | 0.025 | 0.015 | 0.033 |
| Chlorobi                                     | 0.024 | 0.016 | 0.038 |
| Clostridium spiroforme                       | 0.023 | 0.021 | 0.022 |
| Streptococcus suis                           | 0.023 | 0.020 | 0.047 |
| Carnobacteriaceae                            | 0.023 | 0.016 | 0.037 |
| Gramella                                     | 0.023 | 0.013 | 0.018 |
| Alteromonadales                              | 0.023 | 0.012 | 0.020 |
| Clostridium bartlettii                       | 0.023 | 0.010 | 0.024 |
| Porphyromonas uenonis                        | 0.021 | 0.016 | 0.037 |
| Granulicatella                               | 0.021 | 0.015 | 0.035 |
| Helicobacteraceae                            | 0.020 | 5.220 | 0.037 |
| Helicobacter                                 | 0.020 | 5.216 | 0.033 |
| Prevotella marshii                           | 0.020 | 0.026 | 0.035 |
| Desulfitobacterium                           | 0.019 | 0.015 | 0.021 |
| Clostridium carboxidivorans                  | 0.019 | 0.013 | 0.011 |
| unclassified (derived from Flavobacteriales) | 0.019 | 0.009 | 0.025 |
| Rhodobacterales                              | 0.019 | 0.009 | 0.016 |
| Coprobacillus                                | 0.017 | 0.016 | 0.025 |
| Coprobacillus sp. D7                         | 0.017 | 0.016 | 0.025 |
| Sphingobacterium                             | 0.017 | 0.015 | 0.029 |

|                               |       |       |       |
|-------------------------------|-------|-------|-------|
| Pedobacter                    | 0.017 | 0.011 | 0.029 |
| Cryptobacterium               | 0.016 | 0.016 | 0.030 |
| Prevotella oralis             | 0.016 | 0.015 | 0.015 |
| Chloroflexi                   | 0.016 | 0.013 | 0.017 |
| Slackia                       | 0.016 | 0.011 | 0.026 |
| Prevotella sp. oral taxon 317 | 0.015 | 0.015 | 0.036 |
| Selenomonas                   | 0.015 | 0.015 | 0.020 |
| Prevotella bergensis          | 0.015 | 0.009 | 0.036 |
| Clostridium beijerinckii      | 0.015 | 0.008 | 0.035 |
| Porphyromonas endodontalis    | 0.013 | 0.031 | 0.086 |
| Helicobacter hepaticus        | 0.000 | 4.952 | 0.013 |
| Deferribacteres               | 0.000 | 0.015 | 0.022 |
| Clostridium kluveri           | 0.000 | 0.013 | 0.019 |
